# Supplementary material
Source: HighWire-hosted journal article supplement (https://rapm.bmj.com/highwire/filestream/12269/field_highwire_adjunct_files/0/rapm-2019-101119supp001_data_supplement.pdf)
Supplement: rapm-2019-101119supp001_data_supplement.pdf [file rapm-2019-101119supp001_data_supplement.pdf]

**Supplementary Table 1:** Adjusted and unadjusted models comparing change scores in inspiratory volume and the number of participants reporting a change in their pain scores from severe/moderate to mild/none

|                    | Unadjusted                   |                 |         | Adjusted                     |                  |         |
|--------------------|------------------------------|-----------------|---------|------------------------------|------------------|---------|
|                    | Mean difference <sup>a</sup> | 95%CI           | P Value | Mean difference <sup>a</sup> | 95%CI            | P Value |
| Inspiratory volume |                              |                 |         |                              |                  |         |
| TEA                | Reference                    |                 |         | Reference                    |                  |         |
| PA                 | 35.4                         | -176.3 to 247.1 | 0.74    | -3.3                         | -200.4 to 193.8  | 0.97    |
| SAP                | -34.4                        | -241.0 to 172.1 | 0.75    | -72.7                        | -274.5 to 129.2  | 0.48    |
| Male               |                              |                 |         | Reference                    |                  |         |
| Female             |                              |                 |         | -396.2                       | -578.3 to -214.1 | <0.001  |
| ISS score          |                              |                 |         | -2.6                         | -13.7 to 8.5     | 0.65    |
| RFS score          |                              |                 |         | -7.1                         | -17.8 to 3.6     | 0.20    |
| Age                |                              |                 |         | -7.5                         | -12.43 to -2.65  | 0.003   |
| Pain scores        | RR <sup>b</sup>              | 95%CI           | P Value | RR <sup>b</sup>              | 95%CI            | P Value |
| TEA                | Reference                    |                 |         | Reference                    |                  |         |
| PA                 | 0.9                          | 0.6 to 1.3      | 0.58    | 0.8                          | 0.5 to 1.1       | 0.17    |
| SAP                | 0.7                          | 0.4 to 1.1      | 0.09    | 0.8                          | 0.4 to 1.1       | 0.12    |
| Male               |                              |                 |         | Reference                    |                  |         |
| Female             |                              |                 |         | 1.2                          | 0.9 to 1.5       | 0.25    |
| ISS score          |                              |                 |         | 1.0                          | 1.0 to 1.0       | 0.07    |
| RFS score          |                              |                 |         | 1.0                          | 1.9 to 1.0       | 0.83    |
| Age                |                              |                 |         | 1.0                          | 1.0 to 1.0       | 0.01    |

Abbreviations: RR=relative risk; CI=confidence interval; ISS = Injury Severity Score; PA = Paravertebral; RFS = Rib Fracture Score; SAP = Serratus Anterior Plane; TEA = Thoracic Epidural

Alpha set to 0.05

a: Mean difference (B coefficient) calculated from linear regression models - Mean difference reflects the difference in means between groups

b: RR (exp(B) coefficient) calculated from log binomial models - RR reflects the difference in risk between groups.

Adjusted covariates: age, gender, ISS and RFS score.

**Supplementary Table 2:** Adjusted and unadjusted models comparing in-hospital Mortality risk

|                             | Unadjusted |            |      | Adjusted  |             |       |
|-----------------------------|------------|------------|------|-----------|-------------|-------|
|                             | RR         | 95%CI      | P    | RR        | 95%CI       | P     |
| TEA                         | Reference  |            |      | Reference |             |       |
| PA                          | 0.6        | 0.1 to 1.8 | 0.42 | 0.5       | 0.2 to 1.6  | 0.28  |
| SAP                         | 0.6        | 0.2 to 1.6 | 0.34 | 0.4       | 0.1 to 1.0  | 0.05  |
| Gender – Male               |            |            |      | Reference |             |       |
| Gender – Female             |            |            |      | 0.4       | 0.2 to 1.1  | 0.07  |
| ISS score                   |            |            |      | 1.0       | 1.0 to 1.1  | 0.55  |
| RFS score                   |            |            |      | 1.0       | 0.9 to 1.0  | 0.49  |
| Age                         |            |            |      | 1.1       | 1.0 to 1.1  | <0.01 |
| CCI                         |            |            |      | 1.3       | 1.0 to 1.5  | 0.02  |
| Injured region– chest       |            |            |      | Reference |             |       |
| Injured region – head       |            |            |      | 0.4       | <0.1 to 3.8 | 0.43  |
| Injured region – other      |            |            |      | 0.2       | <0.1 to 1.5 | 0.11  |
| Surgical rib fixation – no  |            |            |      | Reference |             |       |
| Surgical rib fixation – yes |            |            |      | 0.6       | 0.1 to 2.9  | 0.55  |
| Isolated                    |            |            |      | Reference |             |       |
| Poly trauma                 |            |            |      | 1.7       | 0.6 to 4.6  | 0.29  |

Abbreviations: RR=relative risk; CI=confidence interval; CCI = Charlson Comorbidity Index; ISS = Injury Severity Score; PA = Paravertebral; RFS = Rib Fracture Score; SAP = Serratus Anterior Plane; TEA = Thoracic Epidural

Alpha set to 0.05

a: RR (exp(B) coefficient) calculated from log binomial models - RR reflects the difference in risk between groups.

Adjusted covariates: age, gender, ISS, RFS score, CCI, most severely injured body region (head, chest, other), surgical rib fixation and isolated chest injury versus polytrauma

**Supplementary Table 3:** Adjusted and unadjusted models comparing length of stay in critical care and hospital

|                             | Length of stay in critical care |            |                      |           |             |                      | Length of stay in hospital |            |                      |           |            |                      |
|-----------------------------|---------------------------------|------------|----------------------|-----------|-------------|----------------------|----------------------------|------------|----------------------|-----------|------------|----------------------|
|                             | Unadjusted                      |            |                      | Adjusted  |             |                      | Unadjusted                 |            |                      | Adjusted  |            |                      |
|                             | IRR                             | 95%CI      | P-value <sub>a</sub> | IRR       | 95%CI       | P-value <sub>a</sub> | IRR                        | 95%CI      | P-value <sub>a</sub> | IRR       | 95%CI      | P-value <sub>a</sub> |
| TEA                         | Reference                       |            |                      | Reference |             |                      | Reference                  |            |                      | Reference |            |                      |
| PA                          | 0.5                             | 0.3 to 0.8 | 0.01                 | 0.5       | 0.3 to 0.9  | 0.07                 | 0.8                        | 0.6 to 1.0 | 0.03                 | 0.8       | 0.7 to 1.0 | 0.10                 |
| SAP                         | 0.9                             | 0.7 to 1.3 | 0.88                 | 1.0       | 0.6 to 1.3  | 0.95                 | 1.2                        | 1.0 to 1.5 | 0.04                 | 1.0       | 0.9 to 1.2 | 0.77                 |
| Gender – Male               |                                 |            |                      | Reference |             |                      |                            |            |                      | Reference |            |                      |
| Gender – Female             |                                 |            |                      | 0.9       | 0.7 to 1.3  | 0.73                 |                            |            |                      | 1.6       | 1.1 to 1.6 | <0.01                |
| ISS score                   |                                 |            |                      | 1.0       | 1.0 to 1.0  | 0.98                 |                            |            |                      | 1.0       | 1.0 to 1.0 | 0.07                 |
| RFS score                   |                                 |            |                      | 1.0       | 1.0 to 1.0  | 0.01                 |                            |            |                      | 1.0       | 1.0 to 1.0 | <0.01                |
| Age                         |                                 |            |                      | 1.0       | 1.0 to 1.0  | 0.90                 |                            |            |                      | 1.0       | 1.0 to 1.0 | 0.64                 |
| CCI                         |                                 |            |                      | 1.2       | 1.1 to 1.4  | <0.001               |                            |            |                      | 1.2       | 1.1 to 1.2 | <0.001               |
| Injured region– chest       |                                 |            |                      | Reference |             |                      |                            |            |                      | Reference |            |                      |
| Injured region – head       |                                 |            |                      | 1.5       | 0.9 to 2.6  | 0.09                 |                            |            |                      | 1.8       | 1.3 to 2.5 | <0.01                |
| Injured region – other      |                                 |            |                      | 0.8       | 0.53 to 1.2 | 0.21                 |                            |            |                      | 1.2       | 0.9 to 1.6 | 0.08                 |
| Surgical rib fixation – no  |                                 |            |                      | Reference |             |                      |                            |            |                      | Reference |            |                      |
| Surgical rib fixation – yes |                                 |            |                      | 1.4       | 1.0 to 1.9  | 0.03                 |                            |            |                      | 1.3       | 1.1 to 1.6 | <0.01                |
| Isolated                    |                                 |            |                      | Reference |             |                      |                            |            |                      | Reference |            |                      |
| Poly trauma                 |                                 |            |                      | 1.5       | 1.0 to 2.3  | 0.07                 |                            |            |                      | 1.1       | 0.9 to 1.4 | 0.25                 |

Abbreviations: IRR=Incidence Rate Ratio; CI=confidence interval; CCI = Charlson Comorbidity Index; ISS = Injury Severity Score; PA = Paravertebral; RFS = Rib Fracture Score; SAP = Serratus Anterior Plane; TEA = Thoracic Epidural

Alpha set to 0.05

a: IRR (exp(B) coefficient) calculated from negative binomial models - IRR reflects the difference in incidence of events between groups.

Adjusted covariates: age, gender, ISS, RFS score, CCI, most severely injured body region (head, chest, other), surgical rib fixation and isolated chest injury versus polytrauma.
